# Supplementary material
Source: PubMed Central journal article supplement (PMC9142791)
Supplement: mmc1.pdf [file mmc1.pdf]

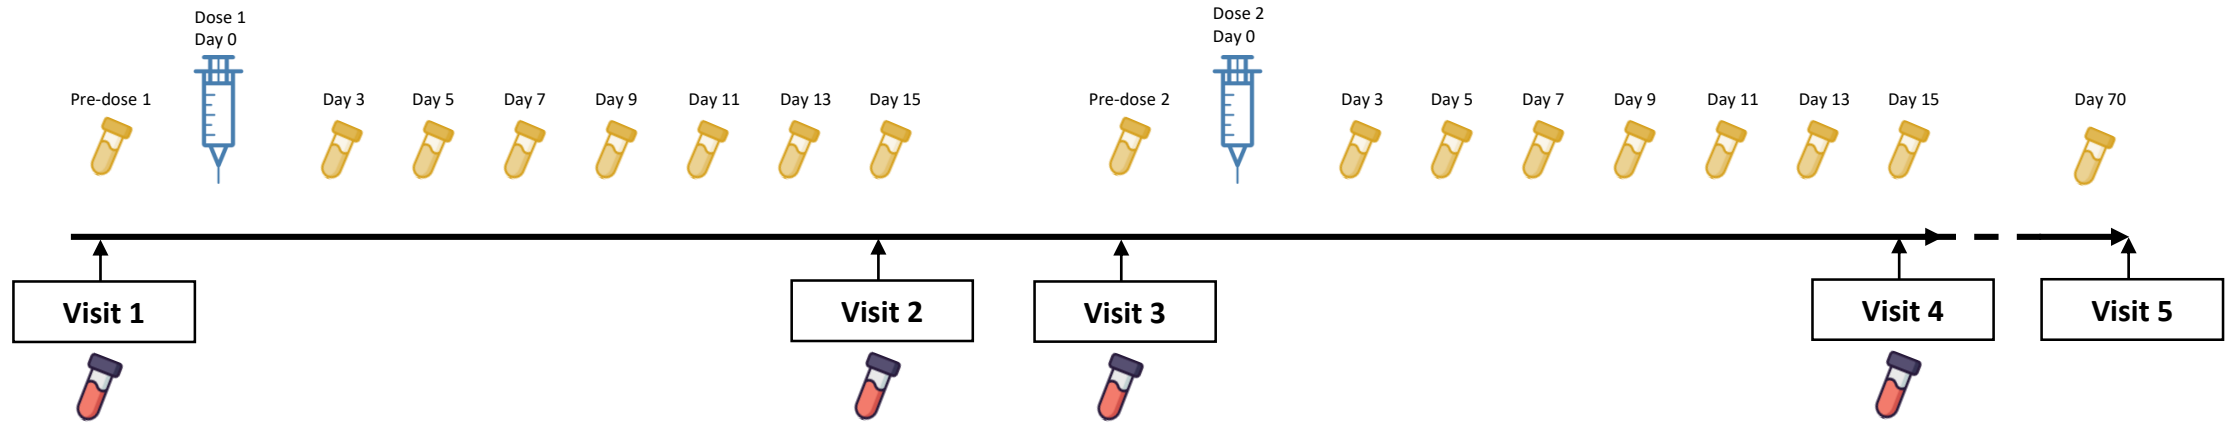

**Supplemental Figure 1.** Data collection.

This figure presents how and when the data was collected, depending on the dates participants received their vaccinations. The last time point, day 70, is the average visit 5 timing across all vaccine groups.

The yellow tubes indicate the day human milk samples were collected; red tubes indicate the days a vena puncture was performed to collect a serum sample; blue needles indicate vaccination date.

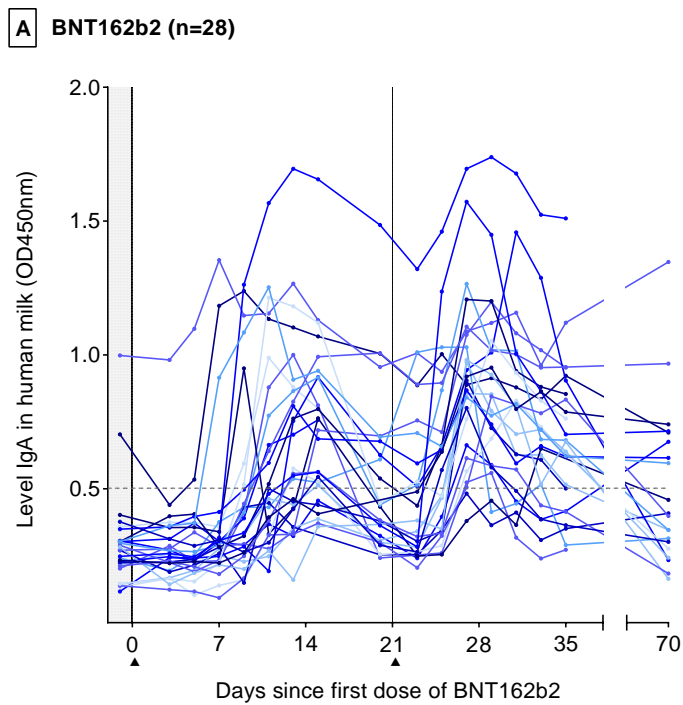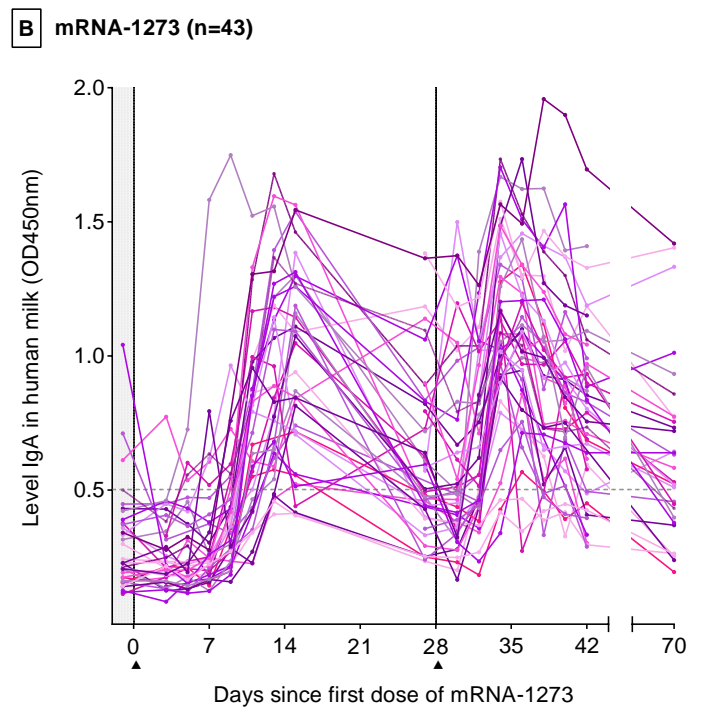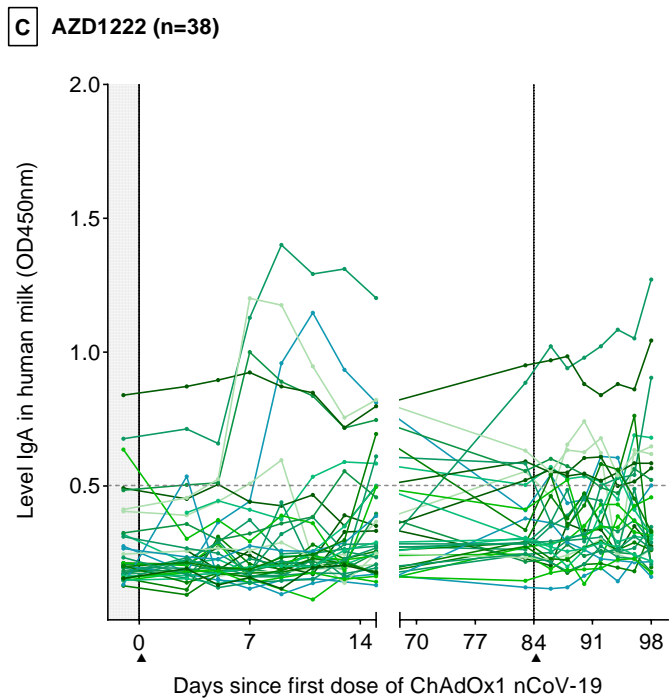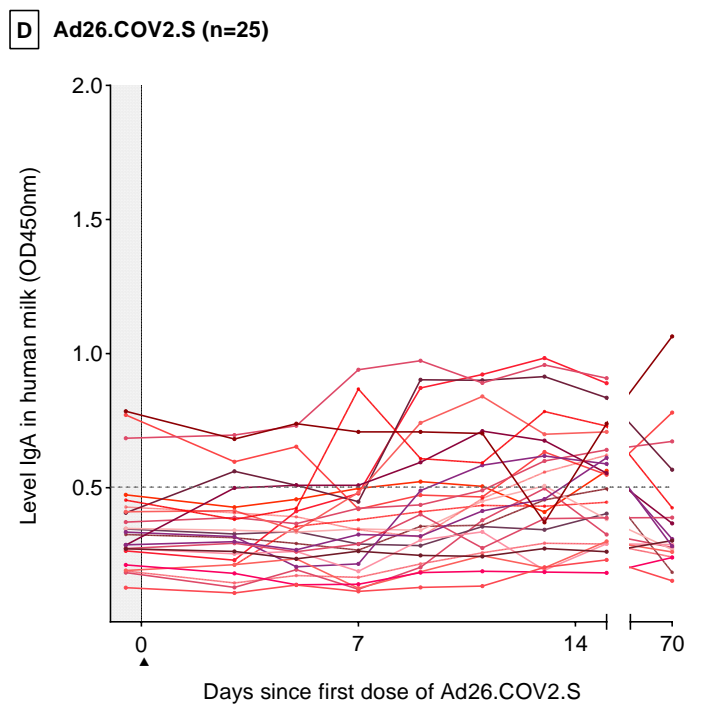

**Supplemental Figure 2.** Individual Immunoglobulin A (IgA) antibody responses. Horizontal dotted line indicates cut-off value; Arrowheads, date receiving a vaccine dose

A. Individual level IgA in human milk of 28 lactating women receiving BNT162b2  
 B. Individual level IgA in human milk of 43 lactating women receiving mRNA-1273  
 C. Individual level IgA in human milk of 38 lactating women receiving AZD1222  
 D. Individual level IgA in human milk of 25 lactating women receiving Ad26.COVS.2.S

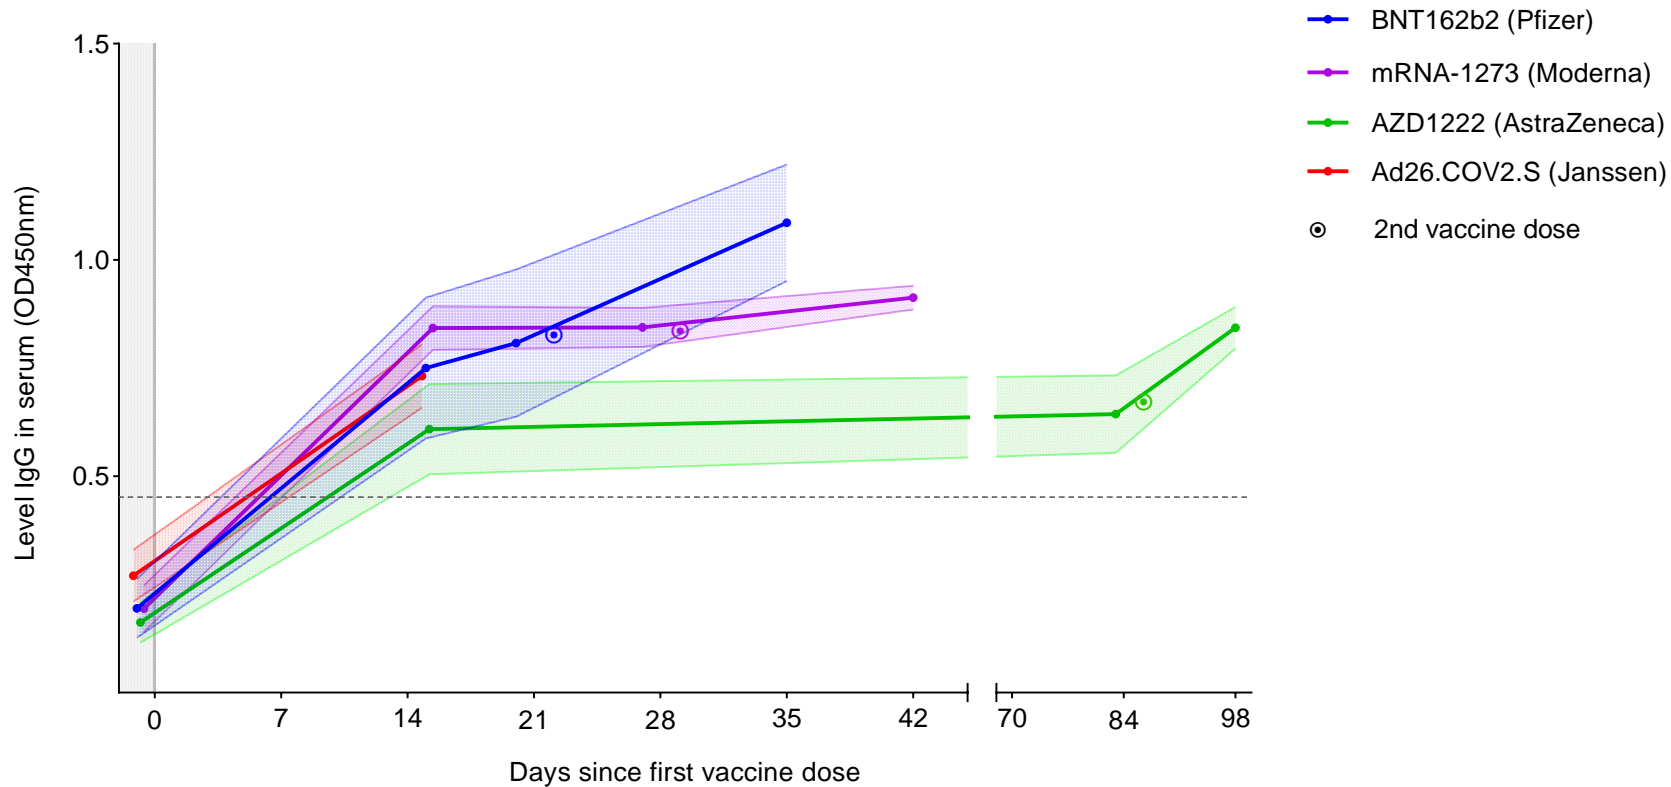

**Supplemental Figure 3.** Mean levels of SARS-CoV-2-specific Immunoglobulin G (IgG) in serum of all groups during entire study period.

The dotted line indicates the cut-off value for level SARS-CoV-2 specific IgG in serum; filled area between error lines indicates the standard deviation
